# Supplementary material for: Translocation, distribution and degradation of prochloraz-loaded mesoporous silica nanoparticles in cucumber plants
Source: Royal Society of Chemistry journal article supplement (doi:10.1039/c7nr08107c), 2017-12-15
Supplement: c7nr08107c1.pdf [file c7nr08107c1.pdf]

1 **Supporting Information**

2

3 **Translocation, distribution and degradation of prochloraz-loaded**  
4 **mesoporous silica nanoparticles in cucumber plant**

5

6 Pengyue Zhao <sup>†,a,b</sup>, Lidong Cao <sup>†,a</sup>, Dukang Ma <sup>a</sup>, Zhaolu Zhou <sup>a</sup>, Qiliang Huang <sup>a,\*</sup>  
7 and Canping Pan <sup>b,\*</sup>

8

9 <sup>a</sup>Key Laboratory of Integrated Pest Management in Crops, Ministry of Agriculture,  
10 Institute of Plant Protection, Chinese Academy of Agricultural Sciences, No. 2

11 Yuanmingyuan West Road, Haidian District, Beijing 100193, P. R. China

12 <sup>b</sup>Department of Applied Chemistry, College of Science, China Agricultural University,  
13 No. 2 Yuanmingyuan West Road, Haidian District, Beijing 100193, P. R. China

14

15 <sup>†</sup>These authors contributed equally to this work.

16 \*Correspondence to: (Q. H.) qlhuang@ippcaas.cn; (C. P.) canpingp@cau.edu.cn.

17

18

19

## 20 **Preparation of suspension concentrates**

21 In order to compare the distribution and degradation of p-MSNs and prochloraz,  
22 conventional prochloraz SC and p-MSNs SC were prepared by bead milling process,  
23 respectively. In the proposed SC, Morwet D425 was used as dispersant. As the active  
24 ingredient, prochloraz accounted for 20 % in both p-MSNs and conventional SC. The  
25 particle size and distribution of conventional SC were carried out by BT-9300ST laser  
26 particle size distribution analyzer (Bettersize Instruments Ltd., Liaoning, China). The  
27  $D_{50}$  and  $D_{90}$  of the particle size was 1.397 and 3.771  $\mu\text{m}$  for conventional SC,  
28 respectively.

29

## 30 **Sample preparation and analytical method**

31 A modified QuEChERS method was carried out to measure the concentration  
32 levels of prochloraz and its metabolite 2,4,6-TCP in cucumber plants. The procedure  
33 involved miniaturized extraction of 2.0 g homogenized sample with acetonitrile,  
34 followed by liquid–liquid partition by adding 3.0 g of sodium chloride. After that, the  
35 processes of cleanup and residual water removal were carried out by mixing 1 mL of  
36 acetonitrile extract with some loose sorbents. For prochloraz analysis, 150 mg of  
37 anhydrous magnesium sulfate and 25 mg of PSA were used as the sorbent; for  
38 2,4,6-TCP analysis, 150 mg of anhydrous magnesium sulfate and 5 mg of MWCNTs  
39 were used. The samples of treated leaves were diluted 20-fold before injection.  
40 HPLC-MS/MS was then operated for confirmatory and quantitative analysis of  
41 prochloraz and 2,4,6-TCP.

42 Prochloraz and 2,4,6-TCP determinations were performed on an Agilent 1200  
43 HPLC equipped with a reversed-phase column (ZORBAX SB-C18, 3.5  $\mu\text{m}$ , 2.1 mm  
44  $\times$  50 mm, Agilent, USA) at 30  $^{\circ}\text{C}$ . The mobile phase was acetonitrile/water (80/20,  
45 v/v) with a flow rate of 0.3 mL/min. The injection volume was 5  $\mu\text{L}$ . An Agilent 6410  
46 Triple Quad LC/MS system with ESI source was conducted for the mass  
47 spectrometric analysis. Nitrogen was introduced as the nebulizer and collision gas.  
48 The parameters of operation were as followed: gas temperature, 350  $^{\circ}\text{C}$ ; gas flow, 8  
49 L/min; nebulizer gas, 35 psi; capillary voltage, 4,000 V. The multiple reaction  
50 monitoring mode was used to monitor the precursor-product ion transitions. Agilent  
51 Mass Hunter Data Acquisition and Qualitative Analysis and Quantitative Analysis  
52 software was employed for method development and data acquisition. Table S1  
53 showed the multiple reaction monitoring transitions and other HPLC–MS/MS  
54 parameters for prochloraz and 2,4,6-TCP analysis.

55

#### 56 **Analytical method validation**

57 The matrix-matched calibration solutions were obtained from calibration solutions  
58 in extracts of blank samples at five different concentrations for prochloraz and  
59 2,4,6-TCP in the range of 0.005 ~ 1 mg/L. To evaluate the precision and accuracy of  
60 the sample preparation method, prochloraz and 2,4,6-TCP were spiked at four  
61 fortified levels of 0.005, 0.01, 0.1 and 1 mg/kg in blank leaf, root and cucumber  
62 samples, respectively. Each spiked level test was repeated five times to verify the  
63 repeatability of the proposed method. Recovery rate was the amount determined as a

64 percentage of the amount of prochloraz or 2,4,6-TCP originally spiked into the blank  
65 samples. The repeatability of the proposed method was shown as a relative standard  
66 deviation (RSD, %, n=5). Limits of quantification (LOQs) were determined as the  
67 concentration of the compound giving a signal to noise ratio (S/N) of 10 for the target  
68 ion, which was calculated by Agilent Mass Hunter Qualitative Analysis software.

Table S1. MRM transitions and other HPLC–MS/MS parameters for prochloraz and 2,4,6-TCP analysis

| Compound   | Retention time (min) | Fragmentor (V) | Quantifying ions | Qualifying ions | Collision energy (V) | Ionization mode |
|------------|----------------------|----------------|------------------|-----------------|----------------------|-----------------|
| prochloraz | 1.28                 | 80             | 376.2/308.2      | 376.2/266.2     | 10;10                | positive        |
| 2,4,6-TCP  | 1.38                 | 80             | 195.0/158.8      | 195.0/93.2      | 40;10                | negative        |

Table S2. Average recoveries at fortified levels of 0.005, 0.01, 0.1 and 1 mg/kg, RSDs (n=5), LOQs, linear equation, determination coefficients ( $R^2$ ) of prochloraz and its metabolite 2,4,6-TCP in leaf, root and cucumber.

| Compound   | Sample   | Linear equation        | $R^2$  | LOQ (mg/kg) | Average recovery % (RSD %) |            |           |         |
|------------|----------|------------------------|--------|-------------|----------------------------|------------|-----------|---------|
|            |          |                        |        |             | 0.005 mg/kg                | 0.01 mg/kg | 0.1 mg/kg | 1 mg/kg |
| prochloraz | Leaf     | $y = 2907302 x - 8257$ | 0.9997 | 0.002       | 71 (6)                     | 80 (5)     | 91 (4)    | 92 (6)  |
|            | Root     | $y = 1966195 x - 1473$ | 0.9999 | 0.001       | 78 (9)                     | 89 (4)     | 87 (3)    | 81 (5)  |
|            | Cucumber | $y = 2051555 x - 83$   | 0.9991 | 0.001       | 77 (10)                    | 92 (6)     | 78 (7)    | 82 (7)  |
| 2,4,6-TCP  | Leaf     | $y = 31071x + 97$      | 0.9998 | 0.005       | 81 (8)                     | 90 (6)     | 74 (8)    | 73 (6)  |
|            | Root     | $y = 43113x - 199$     | 0.9981 | 0.002       | 79 (7)                     | 83 (7)     | 77 (10)   | 82 (5)  |
|            | Cucumber | $y = 26186 x + 718$    | 0.9997 | 0.002       | 73 (9)                     | 81 (9)     | 83 (6)    | 89 (4)  |
